# Supplementary material for: Biophysical clocks face a trade-off between internal and external noise resistance
Source: eLife journal article supplement (doi:10.7554/elife.37624), 2018-07-09
Supplement: supp [file elife-37624-supp-v1.zip]

Archive with 1 entries (1 files):
- elife_poa_e37624_Transparent_Reporting.pdf
